# Supplementary material
Source: PubMed Central journal article supplement (PMC3979965)
Supplement: NIHMS565648-supplement-Supplementary_Information.pdf [file NIHMS565648-supplement-Supplementary_Information.pdf]

## A photochemical method for determining plasma homocysteine with limited sample processing

Lovemore Hakuna, Jorge O. Escobedo, Mark Lowry, Aabha Barve, Naneki McCallum and Robert M. Strongin\*

### Supplementary Material

#### Table of Contents

|                                                                                                                                                                     |    |
|---------------------------------------------------------------------------------------------------------------------------------------------------------------------|----|
| Experimental Methods and Instrumentation.....                                                                                                                       | S2 |
| Reduction of Human Blood Plasma.....                                                                                                                                | S2 |
| General procedure for the photolysis of thiols in the presence of viologens.....                                                                                    | S2 |
| Fig. S1. Spectral response of MV <sup>2+</sup> towards various thiols.....                                                                                          | S3 |
| Fig. S2 Spectral response of BV <sup>2+</sup> towards various thiols in reduced human plasma.....                                                                   | S3 |
| Fig. S3 Absorption spectra of solutions of BV <sup>2+</sup> (20 mM) in human plasma and 0.5 M Tris buffer, pH 7.0 spiked with various concentrations of thiols..... | S4 |

## **Experimental Methods and Instrumentation**

All chemicals were purchased from Sigma-Aldrich and Fisher Scientific and used without further purification. The 0.45  $\mu\text{m}$  *Single STEP*<sup>TM</sup> PVDF filter vials were purchased from Thomson Instrument Company. UV-visible spectra were acquired on a UV-Vis Cary 50 (Agilent Technologies). The light intensity was measured with a Melles Griot Broadband Power/Energy Meter 13PEM001. The light source for the photolysis experiments was a ReptiSun<sup>TM</sup> compact fluorescent lamp (Zoo Med Laboratories Inc.).

### **Reduction of Human Blood Plasma**

Reconstituted human plasma is incubated with immobilized TCEP gel in a 1:1 volume ratio at room temperature for 1 h with vortexing. Separation of the reduced plasma from the gel can be achieved by centrifugation at 1000 rpm for 5 min or by filtration using a *Single STEP*<sup>TM</sup> 0.45  $\mu\text{m}$  PVDF filter vial.

### **General procedure for the photolysis of thiols in the presence of viologens**

In a quartz cuvette sealed with a rubber septum (GL14-S, Starna Cells), a solution of viologen (20 or 50 mM in 0.5 M Tris buffer pH 7.0) is deoxygenated by bubbling Ar for 5 min. Human plasma (spiked or non spiked) is added to the cuvette and irradiated for 15 min with a ReptiSun<sup>TM</sup> lamp. Absorption spectra is collected on a UV-Vis Cary 50. The proportion of the plasma solution is 10% of the total volume after being mixed with the viologen solution.

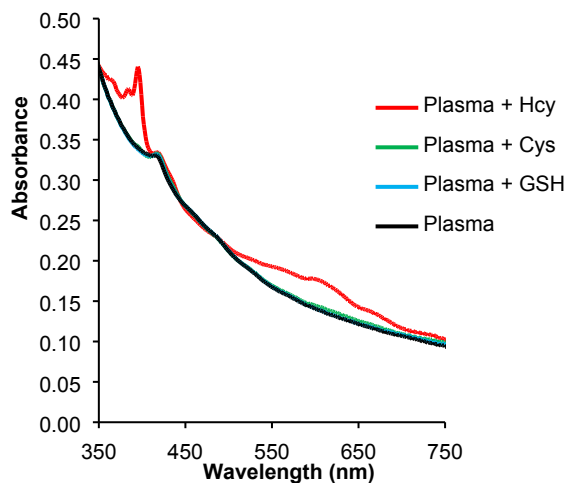

**Fig. S1** Spectral response of  $MV^{2+}$  towards various spiked thiols in human blood plasma upon irradiation. Absorption spectra of solutions of  $MV^{2+}$  (50 mM) in human blood plasma and 0.5 M Tris buffer (pH 7.0) spiked with 1.5  $\mu$ M Hcy, 25  $\mu$ M Cys and 0.6  $\mu$ M GSH. Plasma (10% v/v) was added to an argon-saturated solution of viologen, thiol and buffer and irradiated for 15 min using a Reptisun™ lamp.

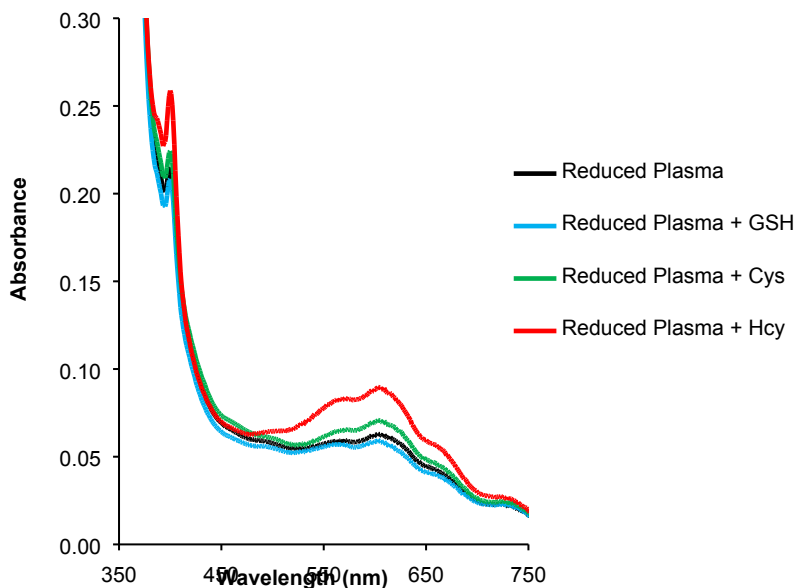

**Fig. S2** Spectral response of  $BV^{2+}$  towards various spiked thiols in reduced human blood plasma upon irradiation. Absorption spectra of solutions of  $BV^{2+}$  (20 mM) in reduced human blood plasma and 0.5 M Tris buffer (pH 7.0) spiked with 1.5  $\mu$ M Hcy, 25  $\mu$ M Cys and 0.6  $\mu$ M GSH. Plasma was incubated for 1 h with TCEP Gel followed by centrifugation at 1000 rpm for 5 min. The reduced, filtered plasma (10% v/v) was added to an argon-saturated solution of viologen, thiol and buffer and irradiated for 15 min using a Reptisun™ lamp.

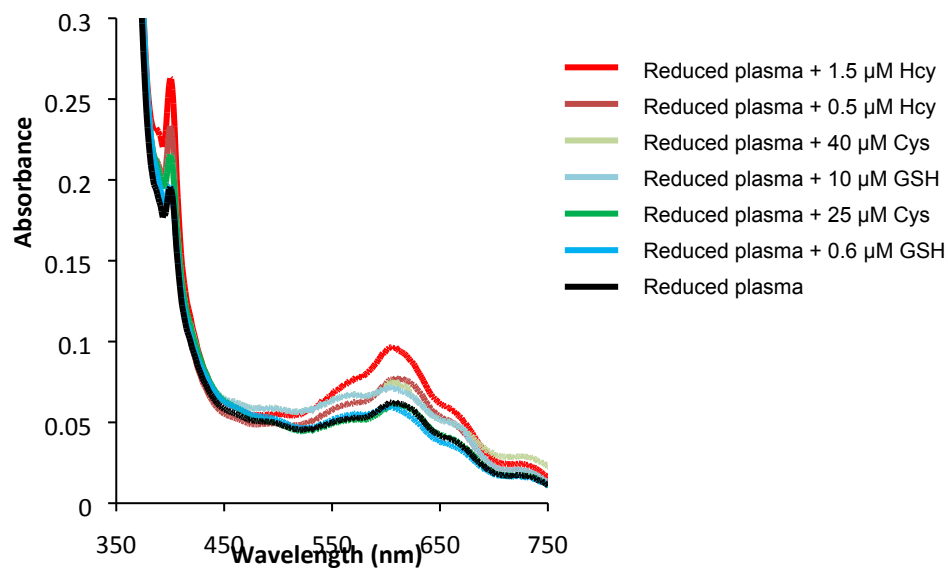

**Fig. S3** Spectral response of  $BV^{2+}$  towards various spiked thiols in reduced human plasma upon irradiation. Absorption spectra of solutions of  $BV^{2+}$  (20 mM) in reduced human blood plasma and 0.5 M Tris buffer (pH 7.0) spiked with increasing concentrations of thiols. Plasma was incubated for 1 h with TCEP Gel followed by centrifugation at 1000 rpm for 5 min. The reduced plasma (10% v/v) was added to an argon-saturated solution of viologen, thiol and buffer and irradiated for 15 min using a Reptisun™ lamp.
